# Supplementary material for: A novel route of colloidal chemistry: room temperature reactive interactions between titanium monoxide and silicon monoxide sols produced by laser ablation in liquid resulting in the formation of titanium disilicide
Source: Royal Society of Chemistry journal article supplement (doi:10.1039/d2dt02065c), 2022-01-01
Supplement: d2dt02065c1.pdf [file d2dt02065c1.pdf]

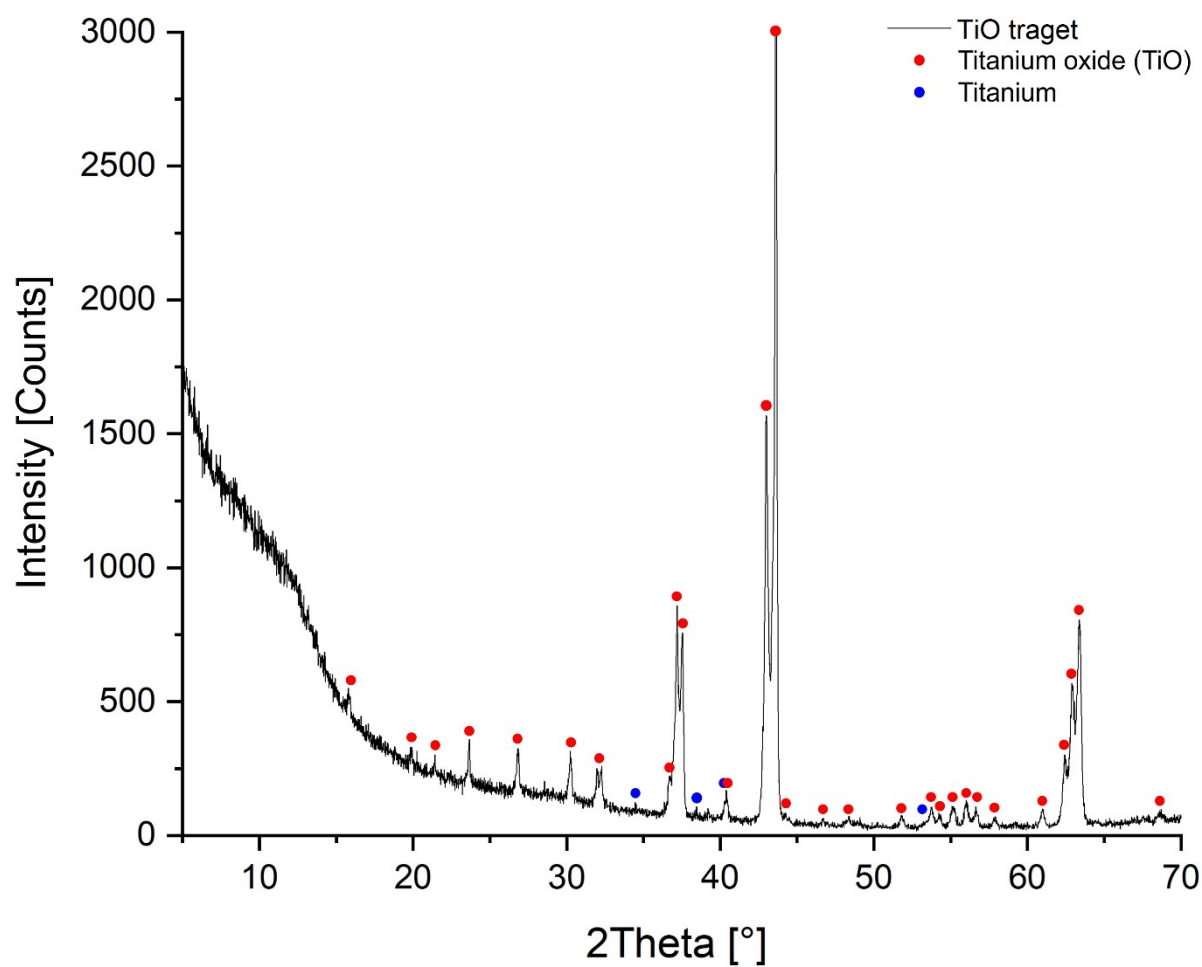

**S1.** XRD spectra of pristine TiO target (spectra of pristine and irradiated target show the same phase composition)

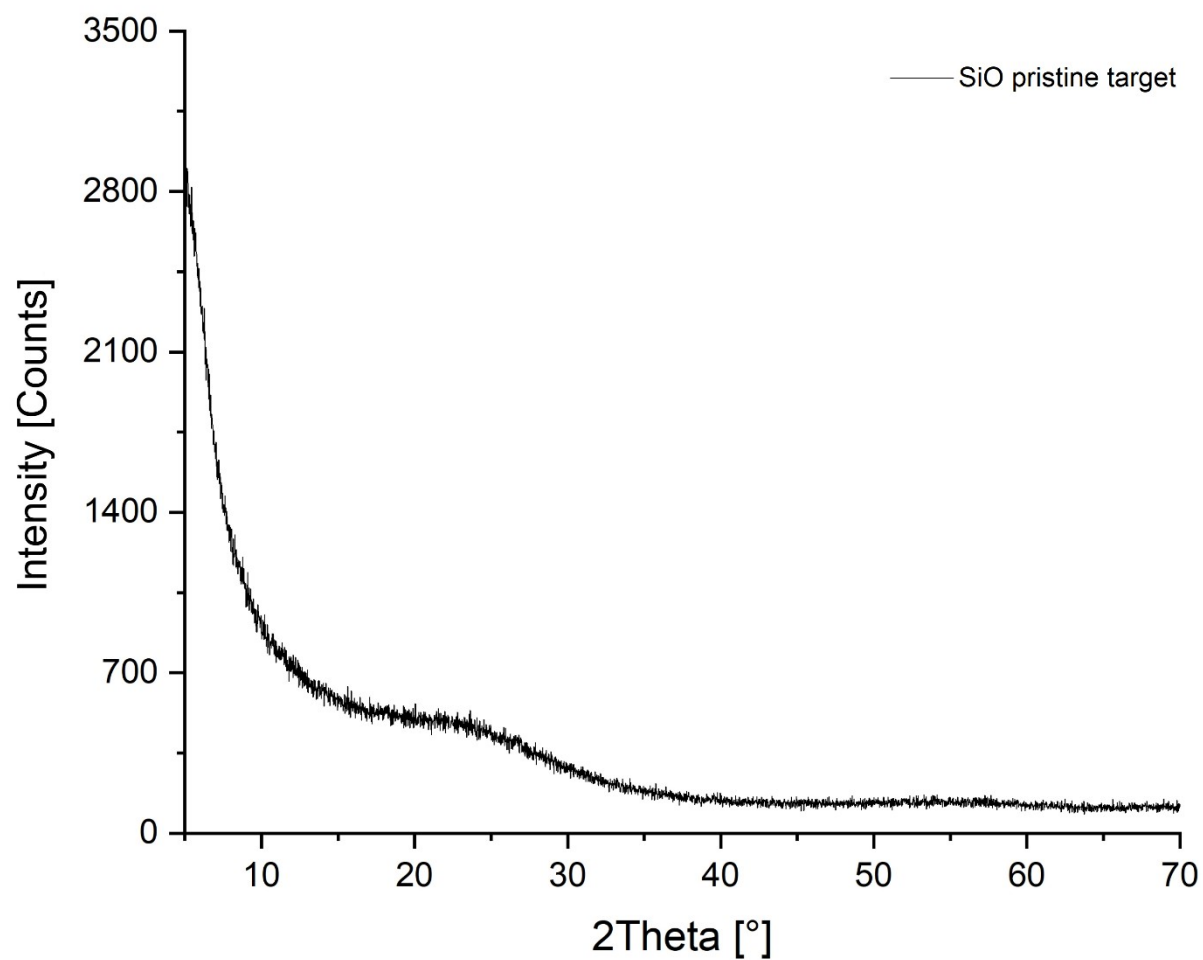

**S2.** XRD spectra of pristine SiO target (measured before pulsed laser irradiation)

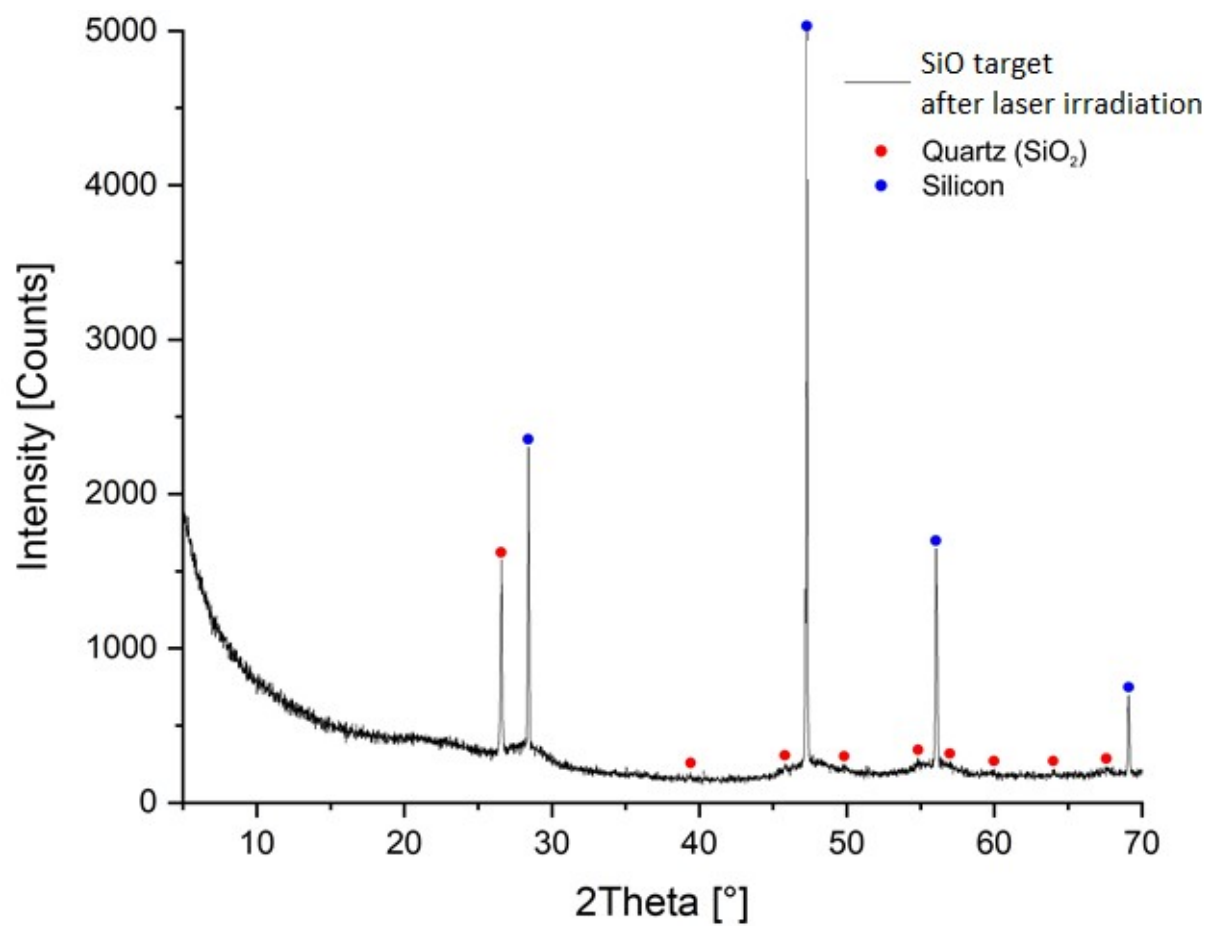

**S3.** XRD spectra of irradiated SiO target (measured after pulsed laser irradiation)

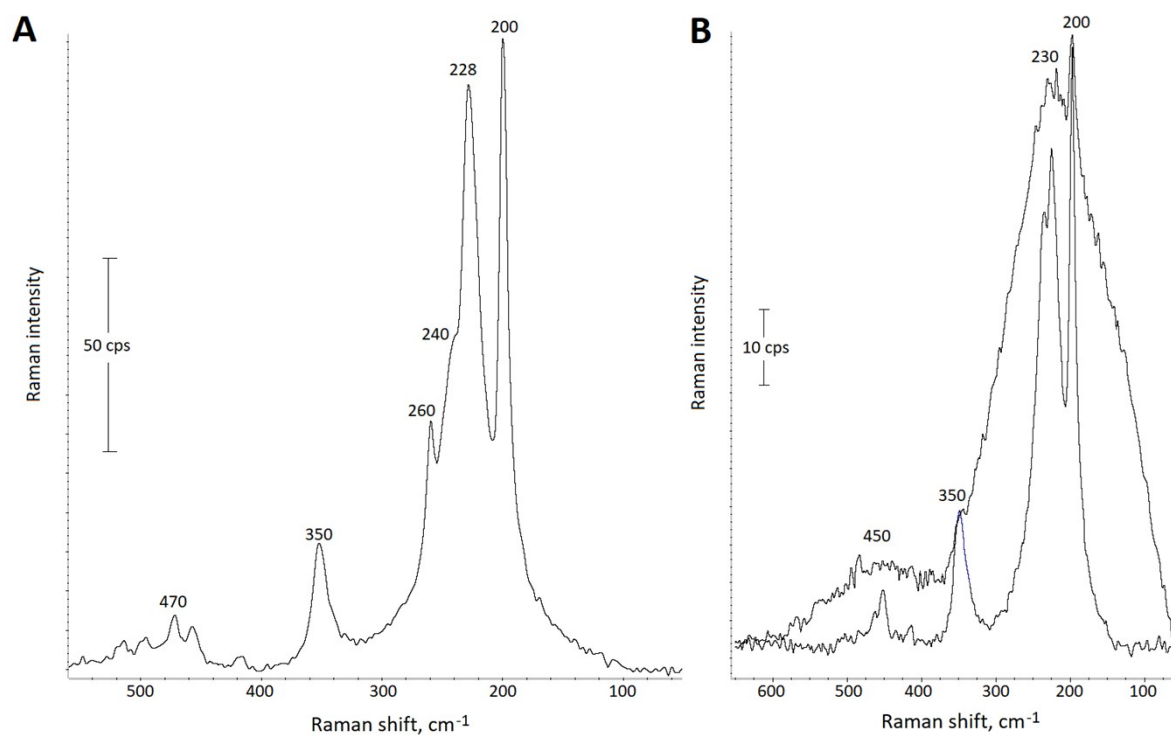

**S4.** Raman spectra of pristine (A) and LAL-modified (B) titanium monoxide target demonstrating crystalline monoclinic TiO (A, B) and amorphous TiO (B).

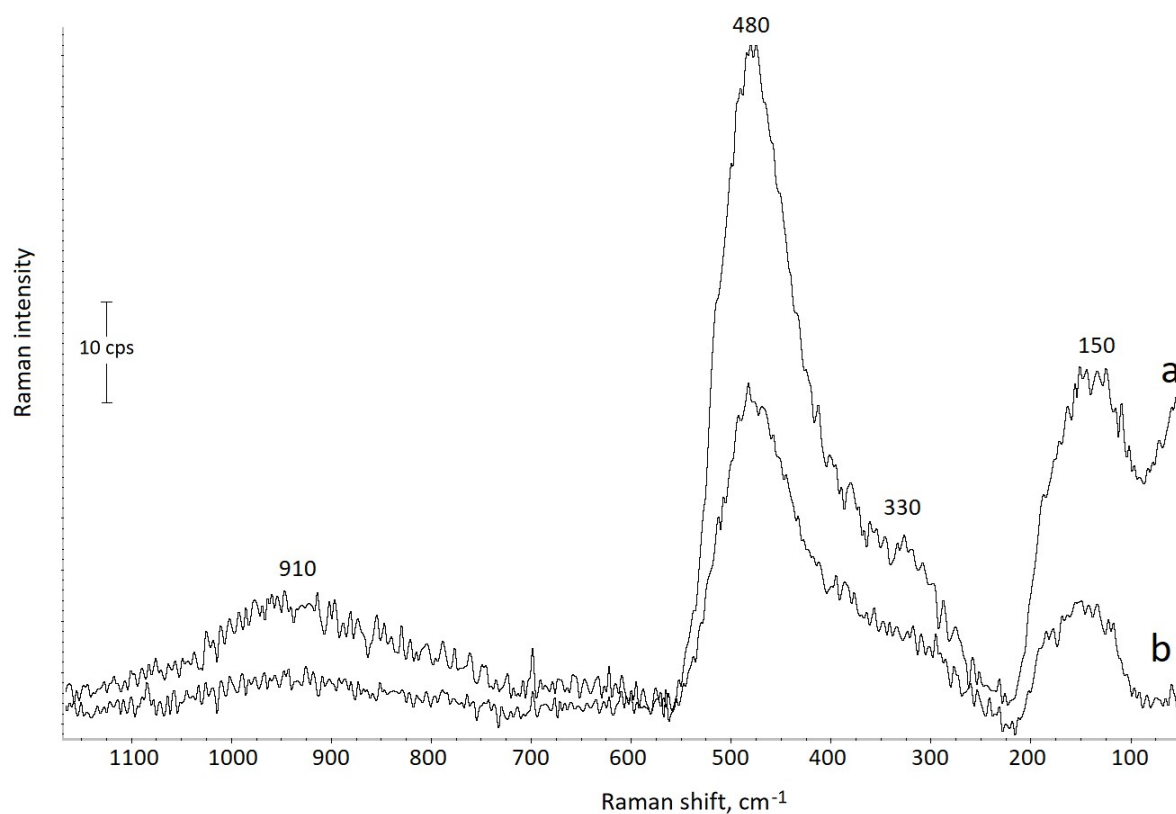

**S5.** Raman spectra of pristine silicon monoxide target (a) and LAL-modified SiO target (b).

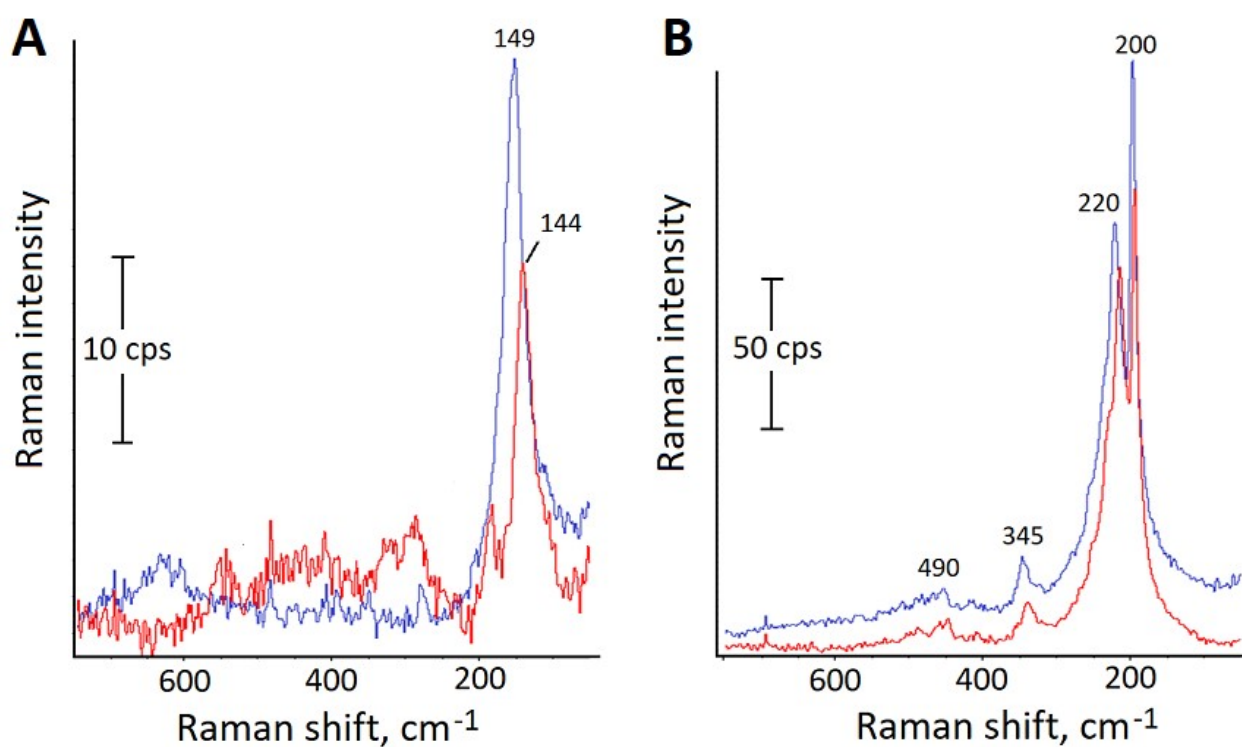

**S6.** Raman spectra of TiO-derived residue from ethanol (red line) and water (blue line) revealing anatase phase (A) and titanium monoxide (B).

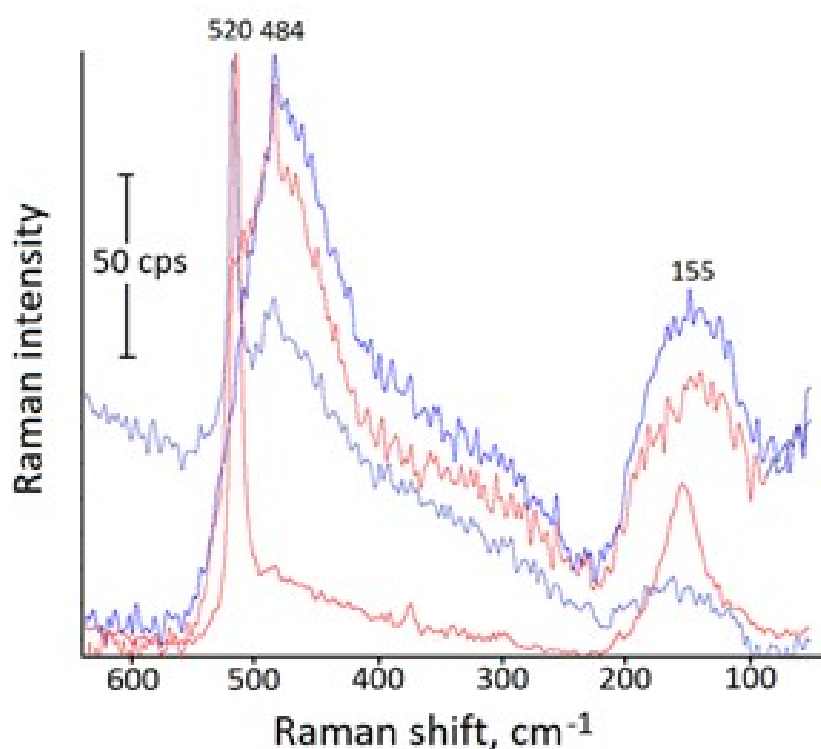

**S7.** Typical Raman spectra of SiO-derived residue from ethanol (red line) and from water (blue line) revealing presence of crystalline Si, nanocrystalline Si and/or  $\text{SiO}_2/\text{SiO}$  and amorphous Si phase

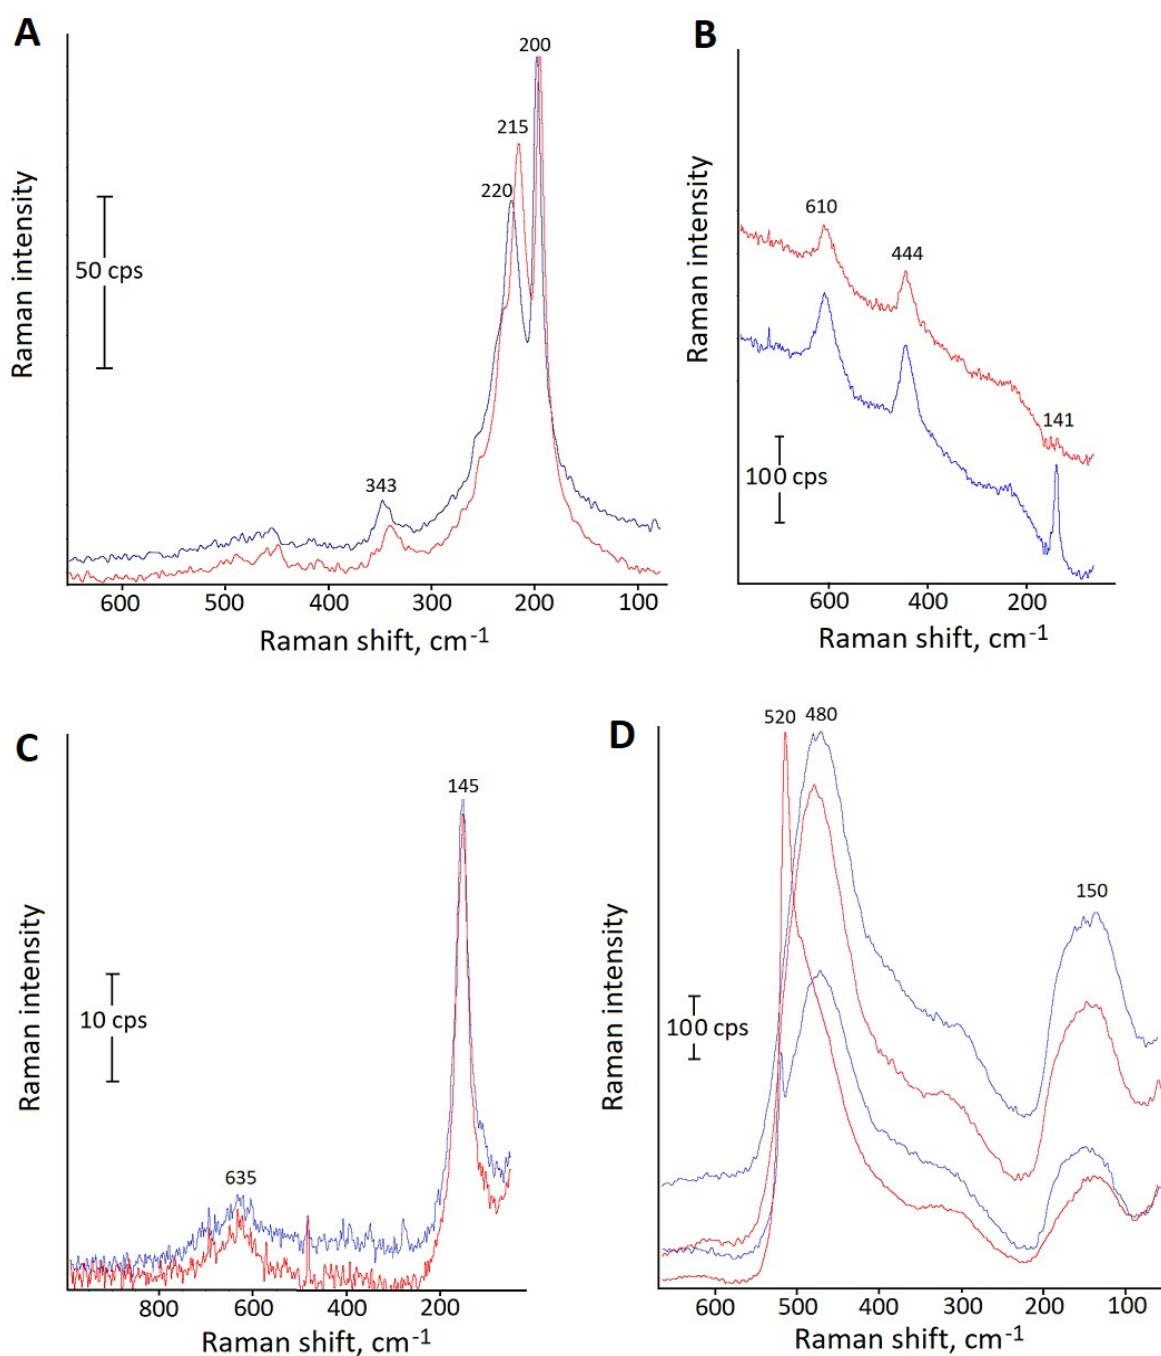

**S8.** Raman spectra of TiO-SiO-derived residues from mixed ethanolic sols (red line) and mixed aquatic sols (blue line) reveal the presence of titanium monoxide (A), rutile (B), anatase (C) crystalline Si, nanocrystalline Si and/or SiO<sub>2</sub>/SiO and amorphous Si phase (D).

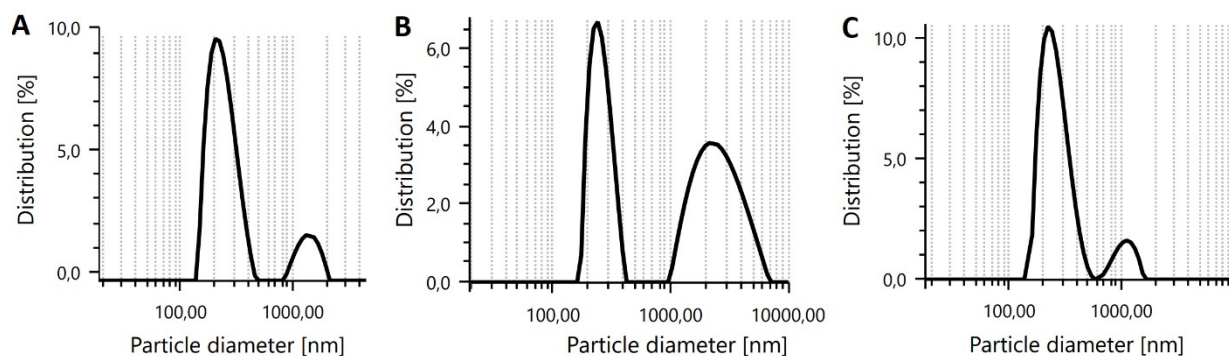

**S9.** Size distribution of TiO-derived particles (A), SiO-derived particles (B) and TiO-SiO-derived particles obtained by laser ablation in ethanol and by subsequent evaporation of the liquid and following ultrasonification in ethanol

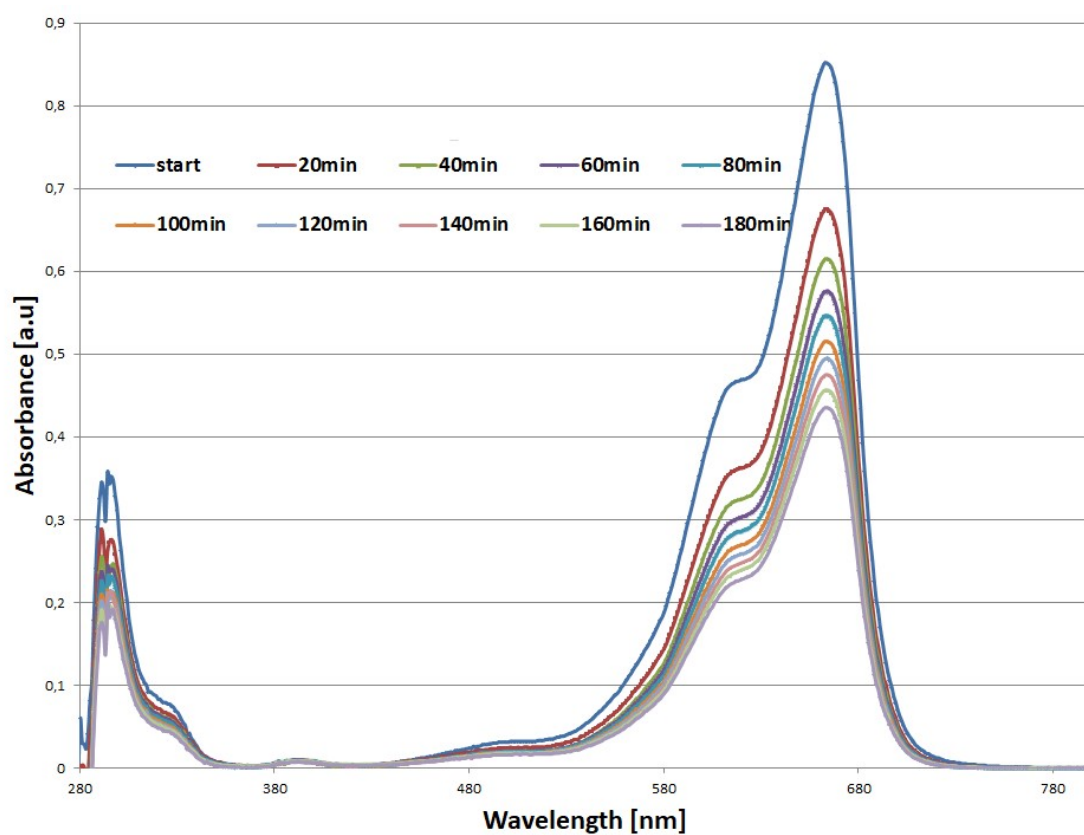

**S10.** Progress of MB degradation in presence of TiO-derived colloid obtained by laser ablation of TiO target in ethanol

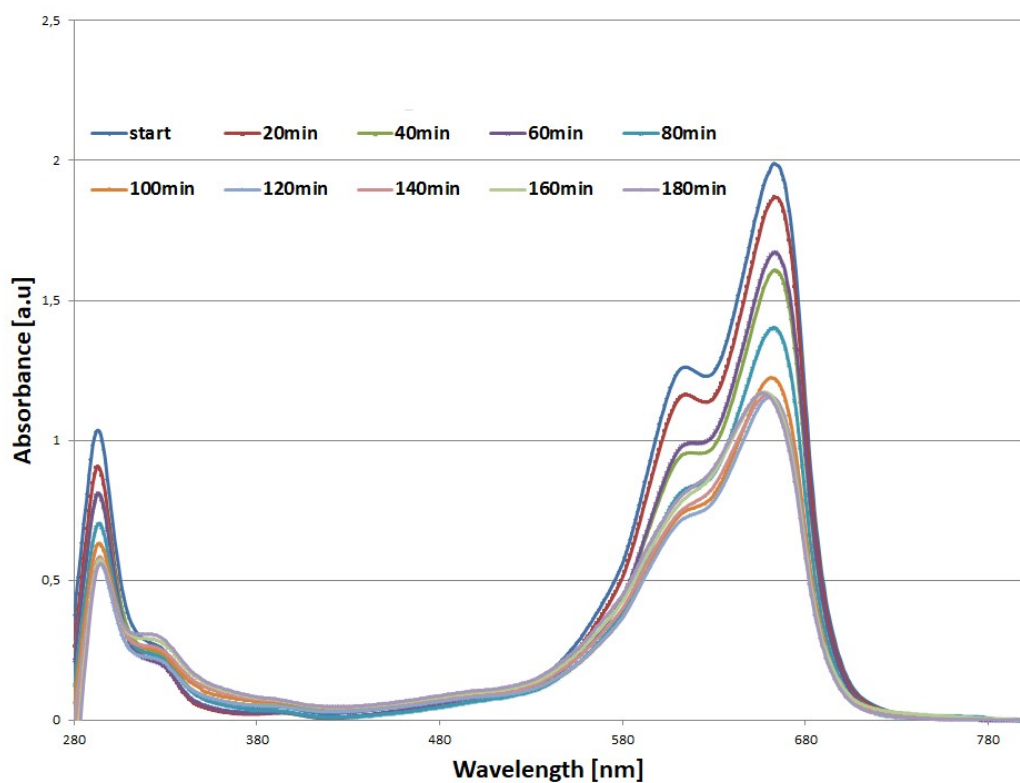

**S11.** Progress of MB degradation in presence of TiO-derived colloid obtained by laser ablation of TiO target in DEI water

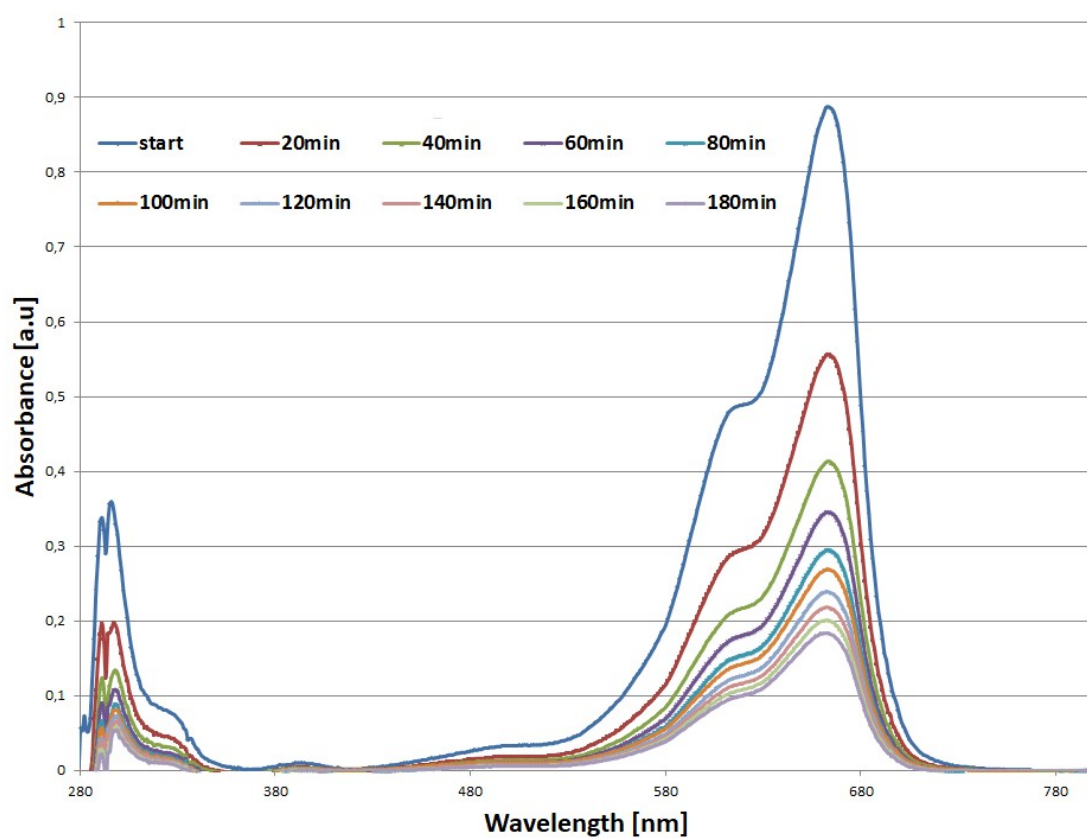

**S12.** Progress of MB degradation in presence of SiO-derived colloid obtained by laser ablation of SiO target in ethanol



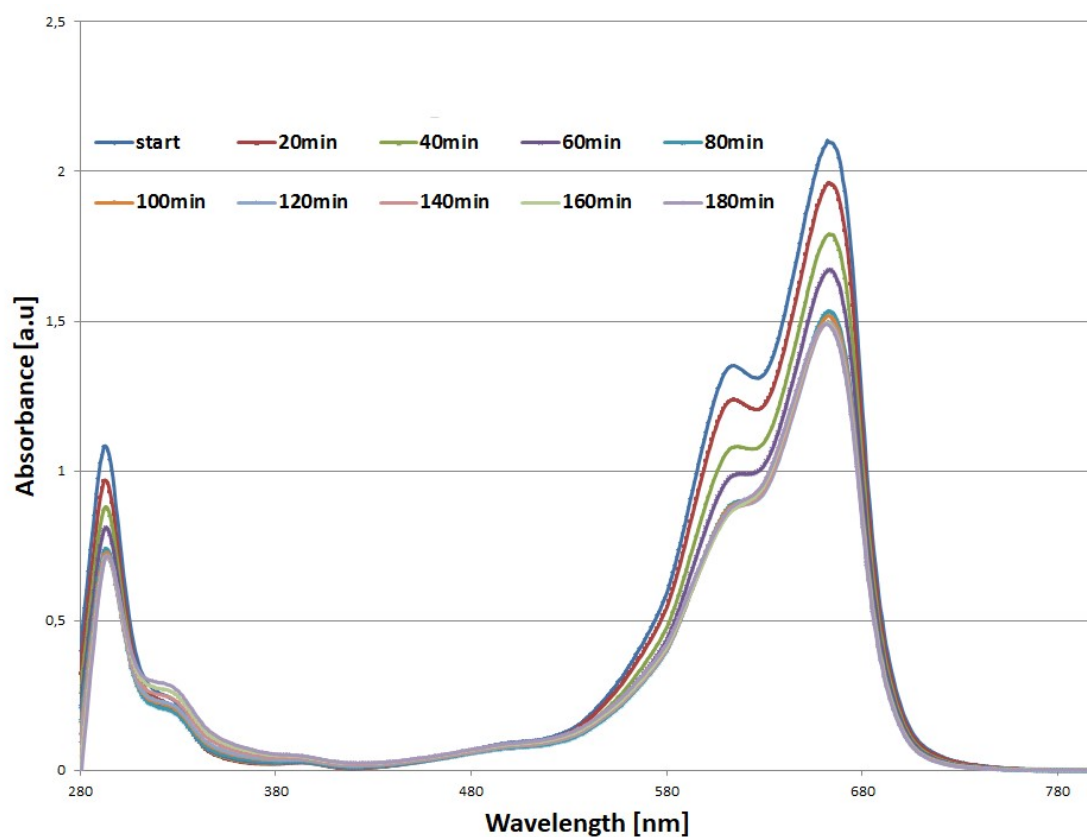

**S13.** Progress of MB degradation in presence of SiO-derived colloid obtained by laser ablation of SiO target in DEI water

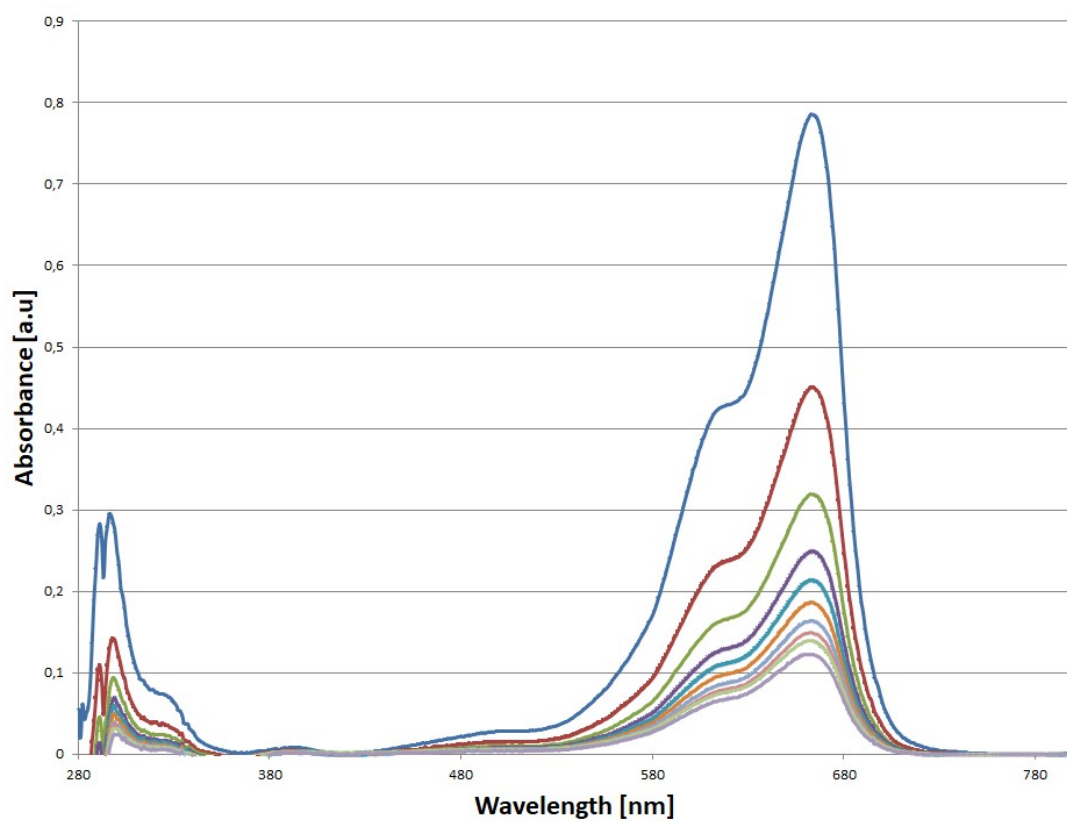

**S14.** Progress of MB degradation in presence of mixed ethanolic TiO-SiO-derived colloid

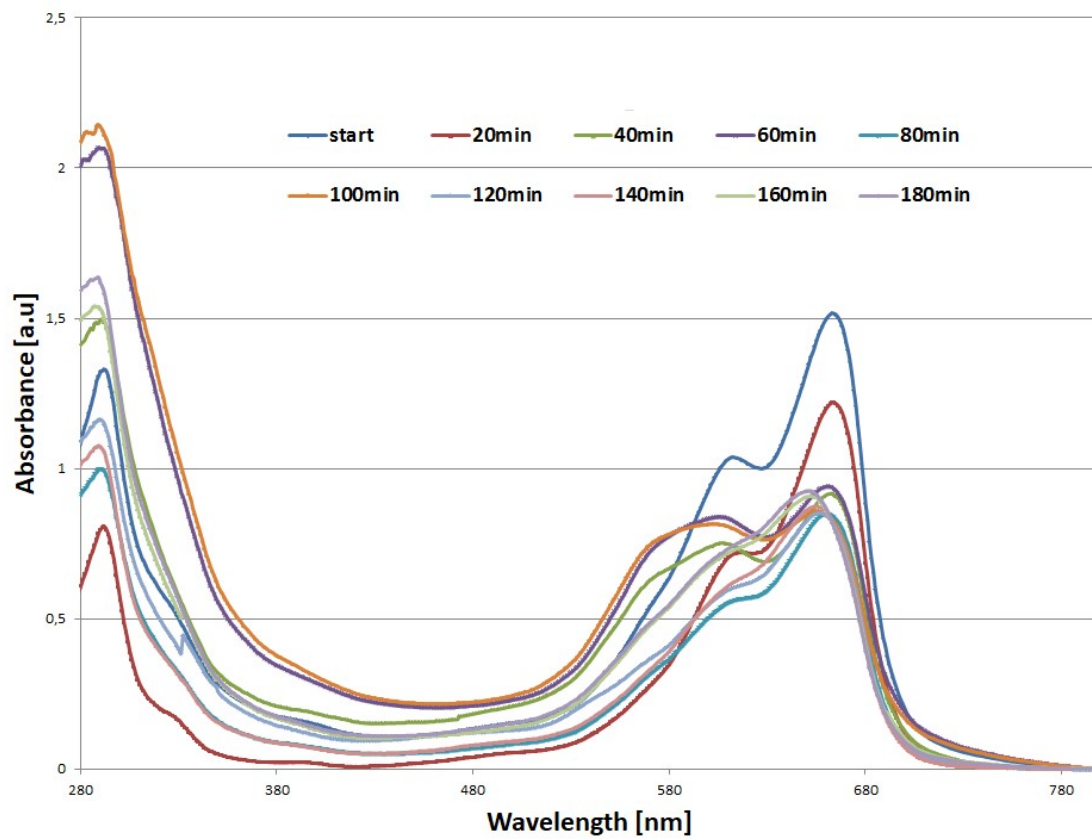

**S15.** Progress of MB degradation in presence of mixed aqueous TiO-SiO-derived colloid
